# Supplementary material for: A highly stretchable strain sensor with both an ultralow detection limit and an ultrawide sensing range
Source: Royal Society of Chemistry journal article supplement (doi:10.1039/d0ta10990h), 2020-12-10
Supplement: d0ta10990h1.pdf [file d0ta10990h1.pdf]

## Highly stretchable strain sensor with both ultralow detection limit and ultrawide sensing range

Hua Li<sup>1,2</sup>, Jianwen Chen<sup>1,3</sup>, Xiaohua Chang<sup>1</sup>, Youquan Xu<sup>1</sup>, Guiyan Zhao<sup>2</sup>, Yutian  
Zhu<sup>1\*</sup>, Yongjin Li<sup>1\*</sup>

<sup>1</sup>College of Materials, Chemistry and Chemical Engineering, Hangzhou Normal University, No. 2318 Yuhangtang Rd., Cangqian, Yuhang District, Hangzhou, 311121, China

<sup>2</sup>College of Petrochemical Engineering, Liaoning Shihua University, No. 1 West Section of Dandong Rd., Wanghua District, Fushun, Liaoning Province, 113001, China

<sup>3</sup>State Key Laboratory of Polymer Physics and Chemistry, Changchun Institute of Applied Chemistry, Chinese Academy of Sciences, Changchun 130022, China

E-mail: ytzhu@hznu.edu.cn (Y.Z.); yongjin-li@hznu.edu.cn (Y.L.)

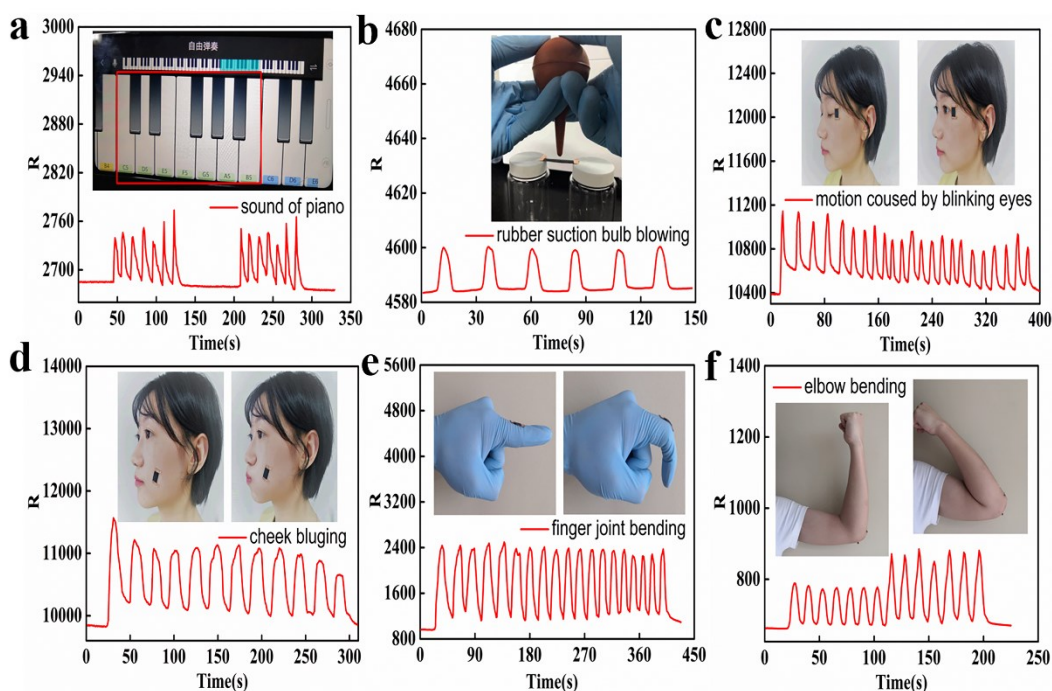

**Fig. S1.** The variation of actual resistance values with time for the demonstration experiments of Figure 6. (a) Detecting the sound of piano. (b) Detecting the blowing of rubber suction bulb. (c) Detecting the blinking eyes of volunteer. (d) Detecting the cheek bulging of volunteer. (e) Detecting the finger joint bending of volunteer. (f)

Detecting the elbow motion with different bending angles of volunteer.
